# Supplementary material for: Alleviating hypoxia by integrating MnO2 with metal–organic frameworks coated upconversion nanocomposites for enhanced photodynamic therapy in vitro
Source: Royal Society of Chemistry journal article supplement (doi:10.1039/d4dt02605e), 2024-11-12
Supplement: d4dt02605e1.pdf [file d4dt02605e1.pdf]

## Supporting Information

### **Alleviating hypoxia by integrating MnO<sub>2</sub> with metal-organic frameworks coated upconversion nanocomposites for enhanced photodynamic therapy *in vitro***

Junxun Zhou,<sup>†a</sup> Mengyue Jiang,<sup>†b</sup> Qiangqiang Zhang,<sup>c</sup> Yuan Jiang,<sup>b</sup> Haifang Wang<sup>\*c</sup> and Lining Sun<sup>\*b</sup>

<sup>†</sup>These authors contributed equally to this work.

\*Corresponding authors

<sup>a</sup> School of Medicine, Shanghai University, Shanghai 200444, China.

<sup>b</sup> Department of Chemistry, College of Sciences, Shanghai University, Shanghai 200444, China. E-mail: [lnsun@shu.edu.cn](mailto:lnsun@shu.edu.cn)

<sup>c</sup> Institute of Nanochemistry and Nanobiology, School of Environmental and Chemical Engineering, Shanghai University, Shanghai 200444, China. E-mail: [hwang@shu.edu.cn](mailto:hwang@shu.edu.cn)

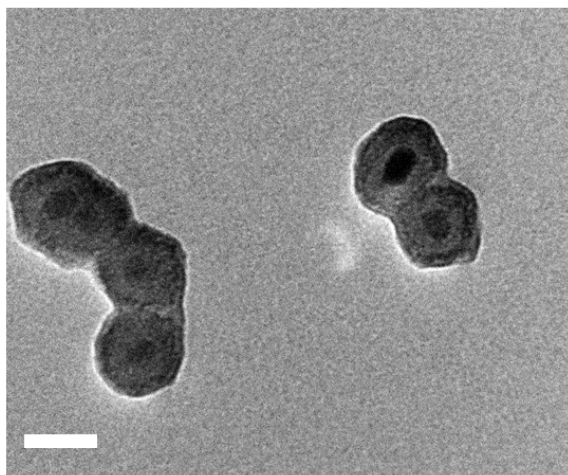

**Fig. S1** TEM image of UMMn. Scale bar: 50 nm.

**Fig. S2** Energy dispersive X-ray spectroscopy (EDS) spectrum of UMMnP.

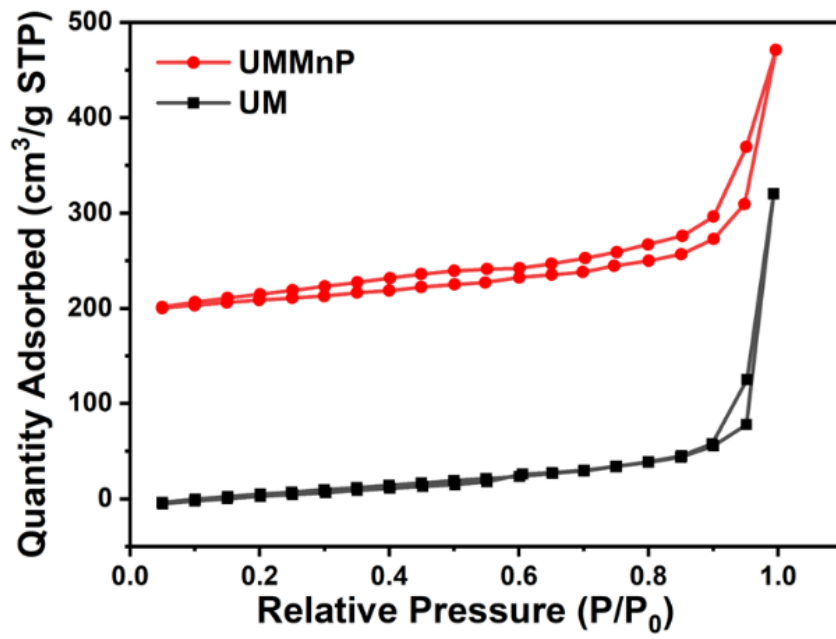

Fig. S3 N<sub>2</sub> adsorption-desorption isotherms of UM and UMMnP.

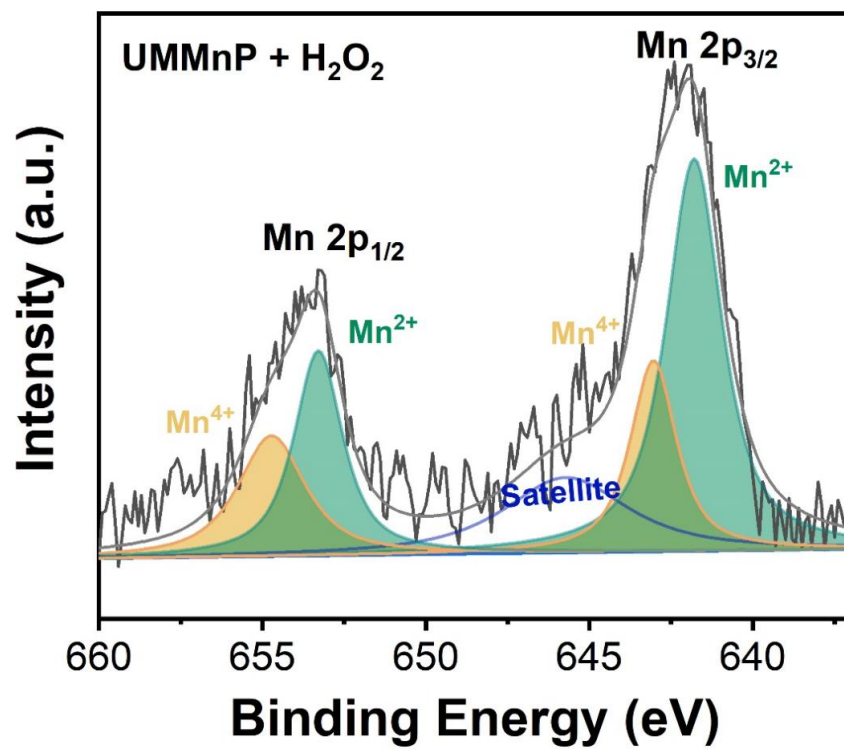

**Fig. S4** High-resolution X-ray photoelectron spectroscopy (XPS) spectrum of Mn 2p of UMMnP with H<sub>2</sub>O<sub>2</sub> treatment.

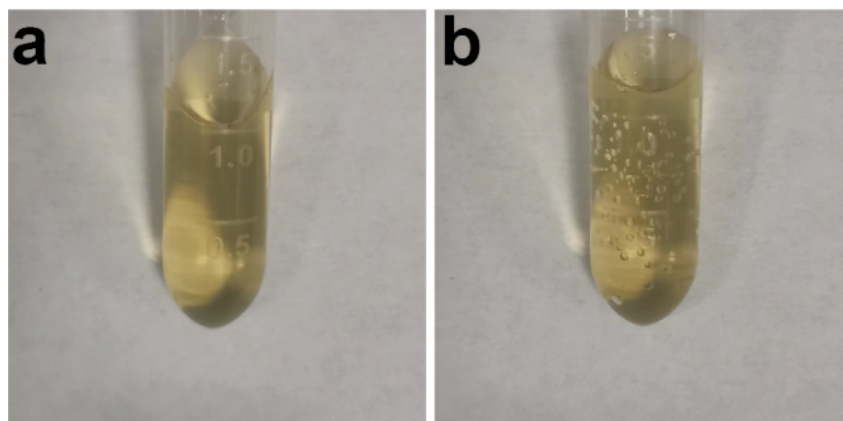

**Fig. S5** Pictures of UMMnP (200  $\mu\text{g}/\text{mL}$ ) mixed with  $\text{H}_2\text{O}_2$  solution (1 mM) for 0 min (a) and 5 min (b).

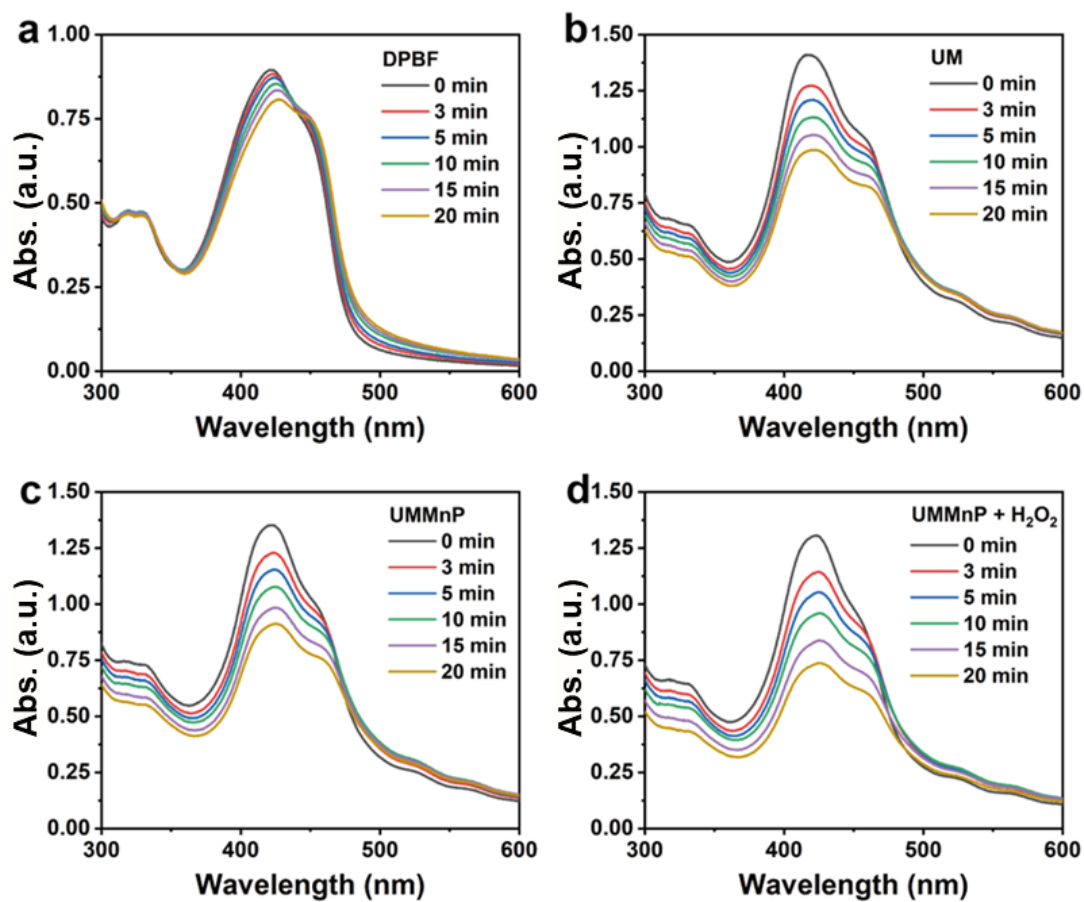

**Fig. S6** Time-dependent UV-Vis absorption spectra of DPBF (a), and DPBF in UM (b), in UMMnP (c), and in UMMnP mixed with H<sub>2</sub>O<sub>2</sub> solution (1 mM) (d) under 980 nm laser irradiation (1.2 W/cm<sup>2</sup>).

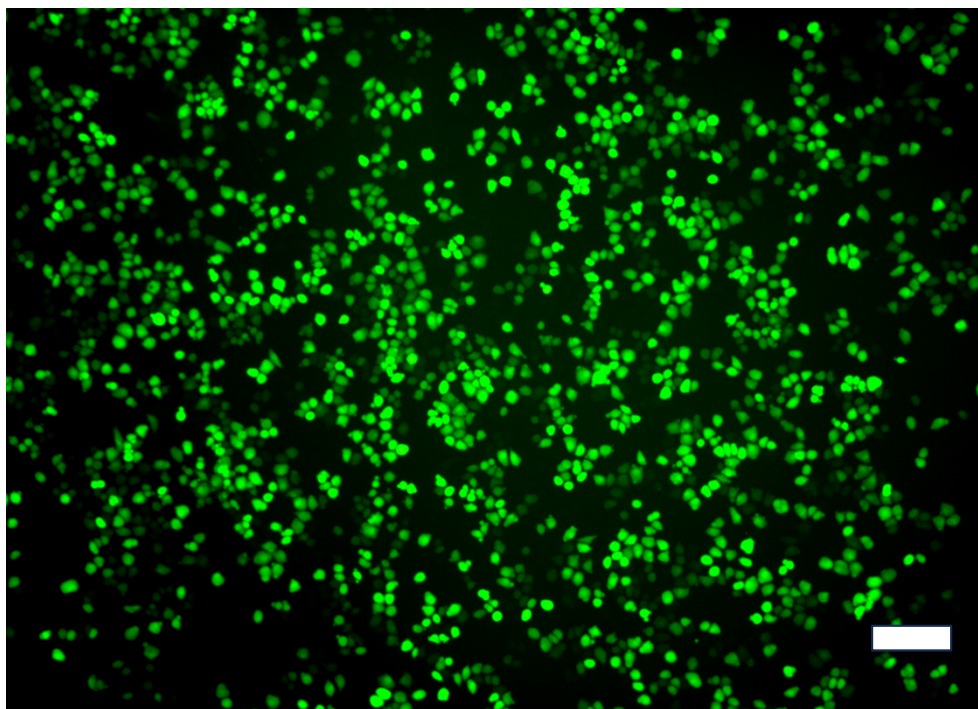

**Fig. S7** Fluorescence image of intracellular reactive oxygen species (ROS) production with the existence of DCFH-DA in HeLa cells treated with 0.15%  $\text{H}_2\text{O}_2$ . Scale bar: 100  $\mu\text{m}$ .
